# Supplementary material for: Exact Simulation of time-inhomogeneous SDEs
Source: Royal Society of Chemistry journal article supplement (doi:10.1039/b908074k), 2013-07-05
Supplement: b908074k.pdf [file b908074k.pdf]

## Supporting Information for

# Dehydrogenation reactivity of a frustrated carbene-borane

## Lewis pair

Dirk Holschumacher, Christina Taouss, Thomas Bannenberg, Cristian G. Hrib,  
Constantin G. Daniliuc, Peter G. Jones and Matthias Tamm\*

*\* Institut für Anorganische und Analytische Chemie, Technische Universität  
Carolo-Wilhelmina, Hagenring 30, D-38106 Braunschweig, Germany.*

*Fax: +49 (251) 391-5309; Tel: +49 (251) 391-5387; E-mail: m.tamm@tu-bs.de*

### Contents:

#### 1. Computational Details

Energies of all optimized structures

Structures and XYZ coordinates

## 1. Computational Details

All computations were performed using the hybrid density functional method M05-2X implemented in the Gaussian03 program.<sup>[1]</sup> For all main-group elements (C, H, N, B, F) the all-electron triple- $\zeta$  basis set (6-311G\*\*) was used.<sup>[2]</sup>

[1] M. J. Frisch, G. W. Trucks, H. B. Schlegel, G. E. Scuseria, M. A. Robb, J. R. Cheeseman, J. A. Montgomery, Jr., T. Vreven, K. N. Kudin, J. C. Burant, J. M. Millam, S. S. Iyengar, J. Tomasi, V. Barone, B. Mennucci, M. Cossi, G. Scalmani, N. Rega, G. A. Petersson, H. Nakatsuji, M. Hada, M. Ehara, K. Toyota, R. Fukuda, J. Hasegawa, T. Ishida, M. Nakajima, Y. Honda, O. Kitao, H. Nakai, M. Klene, X. Li, J. E. Knox, H. P. Hratchian, J. B. Cross, V. Bakken, C. Adamo, J. Jaramillo, R. Gomperts, R. E. Stratmann, O. Yazyev, A. J. Austin, R. Cammi, C. Pomelli, J. W. Ochterski, P. Y. Ayala, K. Morokuma, G. A. Voth, P. Salvador, J. J. Dannenberg, V. G. Zakrzewski, S. Dapprich, A. D. Daniels, M. C. Strain, O. Farkas, D. K. Malick, A. D. Rabuck, K. Raghavachari, J. B. Foresman, J. V. Ortiz, Q. Cui, A. G. Baboul, S. Clifford, J. Cioslowski, B. B. Stefanov, G. Liu, A. Liashenko, P. Piskorz, I. Komaromi, R. L. Martin, D. J. Fox, T. Keith, M. A. Al-Laham, C. Y. Peng, A. Nanayakkara, M. Challacombe, P. M. W. Gill, B. Johnson, W. Chen, M. W. Wong, C. Gonzalez and J. A. Pople, GAUSSIAN 03, Revision C.02, Gaussian, Inc., Wallingford, CT, 2004.

[2] X. Cao and M. Dolg, *J. Chem. Phys.* 2001, **115**, 7348.

### Energies for the optimized structure:

| Compound                                                                                       | E(0 K) <sup>a</sup><br>[Ha] | H(298 K) <sup>b</sup><br>[Ha] | G(298 K) <sup>b</sup><br>[Ha] |
|------------------------------------------------------------------------------------------------|-----------------------------|-------------------------------|-------------------------------|
| H <sub>4</sub> tBu <sub>2</sub> ImC: ( <b>1b</b> )                                             | -541.613456                 | -541.612512                   | -541.668949                   |
| B(C <sub>6</sub> F <sub>5</sub> ) <sub>3</sub>                                                 | -2208.520061                | -2208.519116                  | -2208.608800                  |
| H <sub>4</sub> tBu <sub>2</sub> ImC-B(C <sub>6</sub> F <sub>5</sub> ) <sub>3</sub><br>(adduct) | -2750.160193                | -2750.159249                  | -2750.275053                  |
| [H <sub>4</sub> tBuImCH][HB(C <sub>6</sub> F <sub>5</sub> ) <sub>3</sub> ]<br>( <b>3b</b> )    | -2751.375203                | -2751.374259                  | -2751.499391                  |

<sup>a</sup>DFT energy incl. ZPE.

<sup>b</sup>standard conditions T = 298.15 K and p = 1 atm.

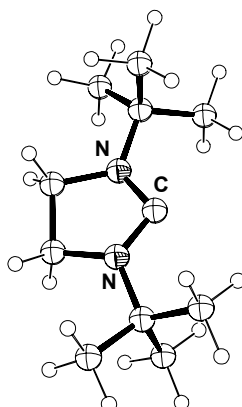

**Structure of the carbene 1b (atom, x-, y-, z-positions in Å):**

|   |          |          |          |
|---|----------|----------|----------|
| N | -1.06947 | -0.23621 | -0.14261 |
| N | 1.06947  | -0.23632 | 0.14270  |
| C | 2.75954  | 0.49057  | -1.48126 |
| C | -2.56661 | 1.59119  | -0.75883 |
| C | -3.41923 | -0.74191 | -0.60123 |
| C | 0.75652  | -1.65712 | -0.09361 |
| C | -2.44491 | 0.27179  | -0.00135 |
| C | 2.44491  | 0.27178  | 0.00133  |
| C | 0.00000  | 0.56438  | 0.00029  |
| C | -0.75653 | -1.65711 | 0.09361  |
| C | 3.41932  | -0.74212 | 0.60062  |
| C | 2.56682  | 1.59098  | 0.75910  |
| C | -2.75984 | 0.49010  | 1.48124  |
| H | 2.65639  | -0.43924 | -2.04376 |
| H | 2.06808  | 1.22637  | -1.89158 |
| H | -2.33648 | 1.43898  | -1.81366 |
| H | 3.78131  | 0.85196  | -1.60717 |
| H | -3.14926 | -0.96422 | -1.63473 |
| H | 1.03312  | -1.94763 | -1.11212 |
| H | -3.58654 | 1.96769  | -0.66683 |
| H | -4.42541 | -0.32341 | -0.58915 |
| H | -1.26525 | -2.31012 | -0.61053 |
| H | -1.86947 | 2.32269  | -0.35974 |
| H | -3.43877 | -1.67230 | -0.03218 |
| H | 3.43886  | -1.67233 | 0.03129  |
| H | 4.42550  | -0.32363 | 0.58854  |
| H | 1.86958  | 2.32258  | 0.36039  |
| H | 3.58676  | 1.96748  | 0.66699  |
| H | 1.26513  | -2.31022 | 0.61055  |
| H | -1.03313 | -1.94770 | 1.11213  |
| H | -3.78171 | 0.85151  | 1.60694  |
| H | 3.14955  | -0.96471 | 1.63413  |
| H | 2.33689  | 1.43839  | 1.81403  |
| H | -2.06847 | 1.22580  | 1.89185  |
| H | -2.65690 | -0.43979 | 2.04345  |

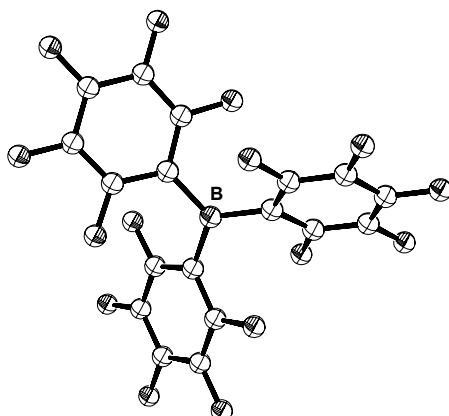

Structure of the borane  $B(C_6F_5)_3$  (atom, x-, y-, z-positions in Å):

|   |          |          |          |
|---|----------|----------|----------|
| B | 0.00041  | 0.00233  | -0.00154 |
| C | -0.50286 | -3.77681 | -0.69516 |
| C | -3.02535 | 2.32614  | -0.68379 |
| C | 3.53271  | 1.44522  | -0.67926 |
| C | -0.66708 | -2.40634 | -0.67775 |
| C | -1.75446 | 1.78741  | -0.66647 |
| C | 2.42732  | 0.61853  | -0.66270 |
| C | 0.55483  | -4.33818 | -0.00085 |
| C | 3.48426  | 2.65037  | -0.00013 |
| C | -4.04004 | 1.68298  | 0.00337  |
| C | 0.20001  | -1.55056 | -0.00274 |
| C | 1.24655  | 0.95041  | -0.00240 |
| C | -1.44443 | 0.60482  | 0.00142  |
| C | 2.33547  | 3.01953  | 0.67796  |
| C | -3.77877 | 0.51030  | 0.69066  |
| C | 1.43862  | -3.52880 | 0.69147  |
| C | 1.24285  | 2.17633  | 0.65903  |
| C | -2.50024 | -0.00992 | 0.67158  |
| C | 1.25450  | -2.16055 | 0.67218  |
| F | -1.34473 | -4.55831 | -1.36288 |
| F | -3.28318 | 3.44875  | -1.34578 |
| F | 4.63612  | 1.09805  | -1.33286 |
| F | -1.70230 | -1.91510 | -1.36335 |
| F | -0.81356 | 2.44507  | -1.34814 |
| F | 2.52532  | -0.52992 | -1.33642 |
| F | 4.53769  | 3.45098  | 0.00040  |
| F | 0.72070  | -5.65097 | 0.00104  |
| F | -5.26191 | 2.19087  | 0.00425  |
| F | 2.29572  | 4.17561  | 1.33159  |
| F | -4.75528 | -0.09853 | 1.35452  |
| F | 2.44904  | -4.07320 | 1.36067  |
| F | 0.16092  | 2.57890  | 1.33003  |
| F | -2.30185 | -1.14020 | 1.35396  |
| F | 2.13299  | -1.42521 | 1.35810  |

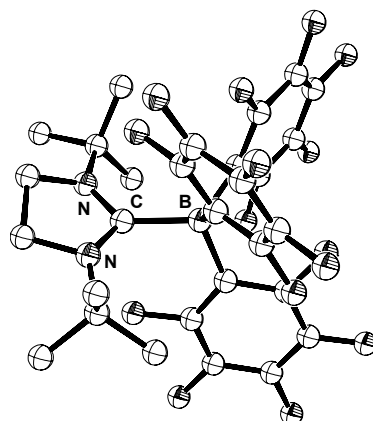

**Structure of the carbene-borane adduct 1b-B(C<sub>6</sub>F<sub>5</sub>)<sub>3</sub> (atom, x-, y-, z-positions in Å):**

|   |          |          |          |
|---|----------|----------|----------|
| B | -0.12851 | 0.14048  | -0.07875 |
| N | -2.02049 | 0.99395  | -1.92277 |
| N | -0.16923 | 2.17665  | -1.85808 |
| C | -1.92445 | 1.59076  | -3.25723 |
| C | -0.94007 | 2.69301  | -3.00326 |
| C | 2.42874  | -0.94820 | -2.89989 |
| C | 2.17757  | 2.59325  | -2.55515 |
| C | -4.42838 | 0.69449  | -2.37843 |
| C | 3.66425  | -0.96439 | -2.28181 |
| C | -2.99315 | -1.28454 | -2.12126 |
| C | 1.32023  | -0.56591 | -2.17473 |
| C | 0.70270  | 4.48291  | -1.83582 |
| C | -3.20769 | 0.14573  | -1.62231 |
| C | 1.06634  | 3.00606  | -1.58149 |
| C | -0.85356 | 1.17071  | -1.26022 |
| C | 3.74759  | -0.58227 | -0.95943 |
| C | 1.32768  | -0.20117 | -0.83040 |
| C | 2.60080  | -0.21012 | -0.27057 |
| C | -0.50209 | -2.58032 | -0.25094 |
| C | 1.61051  | 2.98911  | -0.15785 |
| C | -3.54288 | 0.28534  | -0.13844 |
| C | -0.90205 | -3.82411 | 0.21009  |
| C | -0.83440 | -1.35510 | 0.33524  |
| C | -1.68915 | -3.92220 | 1.33490  |
| C | -0.01925 | 0.90588  | 1.37040  |
| C | -1.62628 | -1.53541 | 1.47870  |
| C | -0.66850 | 2.09107  | 1.67468  |
| C | -2.05784 | -2.75599 | 1.96851  |
| C | 0.58590  | 0.29132  | 2.46197  |
| C | -0.67396 | 2.67139  | 2.92962  |
| C | 0.61187  | 0.83510  | 3.73149  |
| C | -0.01900 | 2.04192  | 3.96825  |
| H | -1.54043 | 0.84150  | -3.95345 |
| H | -0.29244 | 2.88449  | -3.85324 |
| H | -2.87319 | 1.97262  | -3.60828 |
| H | -4.38567 | 0.50599  | -3.45031 |
| H | 1.79562  | 2.41103  | -3.55939 |
| H | -2.84234 | -1.27935 | -3.20189 |
| H | 0.52622  | 4.71489  | -2.88403 |
| H | -1.45063 | 3.61331  | -2.71937 |

Electronic Supplementary Information for Dalton Transactions  
This journal is © The Royal Society of Chemistry 2009

|   |          |          |          |
|---|----------|----------|----------|
| H | 2.91254  | 3.39689  | -2.61212 |
| H | -4.56261 | 1.76066  | -2.19290 |
| H | 2.68635  | 1.69824  | -2.21167 |
| H | -5.30313 | 0.17464  | -1.98826 |
| H | -3.88091 | -1.88052 | -1.90605 |
| H | 1.54657  | 5.08717  | -1.50706 |
| H | -2.13526 | -1.75610 | -1.66733 |
| H | -0.16722 | 4.76897  | -1.24426 |
| H | 2.56749  | 3.51196  | -0.18836 |
| H | -4.16670 | 1.16638  | 0.01379  |
| H | -4.08487 | -0.59092 | 0.21723  |
| H | 1.79300  | 2.00577  | 0.24086  |
| H | 0.95674  | 3.53684  | 0.51557  |
| H | -2.66353 | 0.41973  | 0.46789  |
| F | 2.31791  | -1.29069 | -4.18395 |
| F | 4.75337  | -1.32152 | -2.95420 |
| F | 0.16029  | -0.57915 | -2.86344 |
| F | 0.19441  | -2.65639 | -1.39632 |
| F | -0.54759 | -4.92650 | -0.44919 |
| F | 4.93326  | -0.55413 | -0.35280 |
| F | -1.34777 | 2.77149  | 0.72347  |
| F | 2.83106  | 0.22056  | 0.97850  |
| F | -2.09220 | -5.10347 | 1.78781  |
| F | -2.05410 | -0.50282 | 2.23160  |
| F | 1.12040  | -0.93221 | 2.33982  |
| F | -2.82282 | -2.80725 | 3.05851  |
| F | -1.29477 | 3.83461  | 3.13810  |
| F | 1.21150  | 0.19525  | 4.73408  |
| F | -0.00620 | 2.58284  | 5.18298  |

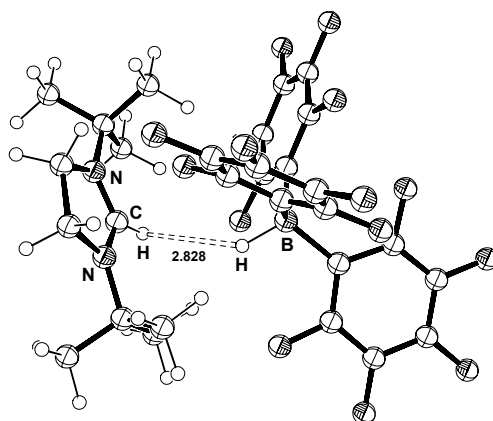

Structure of the ion pair (3b) (atom, x-, y-, z-positions in Å):

|   |          |         |          |
|---|----------|---------|----------|
| B | -0.77018 | 0.01306 | -0.03990 |
| N | 2.71877  | 1.66224 | -1.91913 |
| N | 3.86977  | 0.05681 | -0.93025 |
| C | 2.53083  | 3.28055 | -3.73565 |
| C | 1.03820  | 1.28113 | -3.66776 |
| C | 1.74824  | 2.33346 | -2.82361 |
| C | -3.96547 | 0.42865 | -2.30262 |
| C | 0.74520  | 3.11505 | -1.97534 |

Electronic Supplementary Information for Dalton Transactions  
This journal is © The Royal Society of Chemistry 2009

|   |          |          |          |
|---|----------|----------|----------|
| C | -4.91452 | -0.31666 | -1.63149 |
| C | 2.90951  | 0.37472  | -1.76882 |
| C | -2.68872 | 0.52973  | -1.77619 |
| C | 3.82413  | -2.32019 | -1.54123 |
| C | 3.59702  | 2.40147  | -0.99506 |
| C | 5.77678  | -1.33755 | -0.34637 |
| C | 4.25512  | -1.30640 | -0.48632 |
| C | -4.57412 | -0.94081 | -0.44464 |
| C | -2.29495 | -0.08399 | -0.60042 |
| C | 0.26465  | -2.33298 | -0.54688 |
| C | 4.40758  | 1.28137  | -0.31065 |
| C | 0.73963  | -3.60121 | -0.26328 |
| C | -3.28667 | -0.81075 | 0.04089  |
| C | -0.23126 | -1.46193 | 0.40935  |
| C | 3.58903  | -1.60727 | 0.85647  |
| C | 0.74202  | -4.04147 | 1.04633  |
| C | -0.54204 | 1.14195  | 1.11822  |
| C | 0.75463  | 1.53752  | 1.39111  |
| C | -0.22033 | -1.95259 | 1.70690  |
| C | -1.50743 | 1.83123  | 1.83642  |
| C | 0.25493  | -3.21137 | 2.03923  |
| C | 1.10557  | 2.54984  | 2.25951  |
| C | -1.20636 | 2.84693  | 2.73269  |
| C | 0.10874  | 3.21685  | 2.94460  |
| H | 1.84284  | 3.72475  | -4.45395 |
| H | 3.30289  | 2.73959  | -4.28440 |
| H | 0.32865  | 1.78958  | -4.31785 |
| H | 1.74727  | 0.74021  | -4.29811 |
| H | 2.99222  | 4.09377  | -3.17536 |
| H | 0.46935  | 0.58531  | -3.05390 |
| H | 0.00743  | 3.57359  | -2.63283 |
| H | 4.28316  | -2.09697 | -2.50583 |
| H | 2.32367  | -0.36383 | -2.29109 |
| H | 4.23126  | 3.08738  | -1.55103 |
| H | 2.74423  | -2.36748 | -1.65883 |
| H | 6.26019  | -1.05666 | -1.28297 |
| H | 1.23826  | 3.91102  | -1.41554 |
| H | 4.15284  | -3.30923 | -1.22602 |
| H | 0.22262  | 2.45265  | -1.28903 |
| H | -0.06473 | 0.35286  | -0.95758 |
| H | 5.47294  | 1.36189  | -0.51112 |
| H | 6.08467  | -2.34977 | -0.08844 |
| H | 2.99726  | 2.95618  | -0.27857 |
| H | 6.12072  | -0.67556 | 0.44830  |
| H | 4.23276  | 1.26164  | 0.76233  |
| H | 2.50643  | -1.54387 | 0.76926  |
| H | 3.86274  | -2.61321 | 1.17634  |
| H | 3.91470  | -0.90672 | 1.62546  |
| F | -4.28626 | 1.03915  | -3.44829 |
| F | -1.81895 | 1.28282  | -2.48509 |
| F | -6.14946 | -0.42995 | -2.12047 |
| F | 0.34748  | -1.95077 | -1.84490 |
| F | 1.23585  | -4.38327 | -1.23104 |
| F | -5.49111 | -1.65318 | 0.21358  |
| F | 1.78957  | 0.92368  | 0.76074  |
| F | 1.21864  | -5.24954 | 1.34860  |
| F | -3.01933 | -1.41406 | 1.20888  |

Electronic Supplementary Information for Dalton Transactions  
This journal is © The Royal Society of Chemistry 2009

|   |          |          |         |
|---|----------|----------|---------|
| F | -2.80681 | 1.54456  | 1.69421 |
| F | 2.39594  | 2.89385  | 2.41909 |
| F | -0.67921 | -1.20690 | 2.71891 |
| F | 0.25223  | -3.63400 | 3.30437 |
| F | -2.17661 | 3.48074  | 3.39241 |
| F | 0.40973  | 4.19950  | 3.79287 |
